# Supplementary material
Source: publisher figshare collection journal article supplement (https://acs.figshare.com/ndownloader/files/13657904)
Supplement: Supplementary file 1 [file 13657904]

## Supporting Information

A single-molecule homogenous immunoassay by counting spatially “overlapping” two-color quantum dots with wide-field fluorescence microscopy

Xiaojun Liu<sup>‡, a</sup>, Conghui Huang<sup>‡, a</sup>, Chenghua Zong<sup>‡, a</sup>, Aiye Liang<sup>b</sup>, Zhangjian Wu<sup>a</sup>, Yusu Zhang<sup>a</sup>, Qingquan Zhang<sup>a</sup>, Wenfeng Zhao<sup>a</sup>, Hongwei Gai<sup>\*, a</sup>

<sup>a</sup> School of Chemistry and Materials Science, Jiangsu Key Laboratory of Green Synthesis for Functional Materials, Jiangsu Normal University, Xuzhou, Jiangsu, 221116, China.

<sup>b</sup> Department of Physical Sciences, Charleston Southern University, Charleston, South Carolina, United States

### Data processing

Homogenous immunoassay was done in triplicate. Randomly selected images from 3 glass slides were zoomed in with Image J, and the yellow and red dots from these images were manually counted. The counting stopped until the number of the red dots was over 100. Then the ratio of the yellow spots to the red spots (or the green spots), defined as the immunocomplex rate (IR), was calculated. The error bars referred to the standard error of the mean of the triplicate experiments.

With AFP as an example, the partial screenshots for counting and the statistics result of the triplicate experiments are given as following:

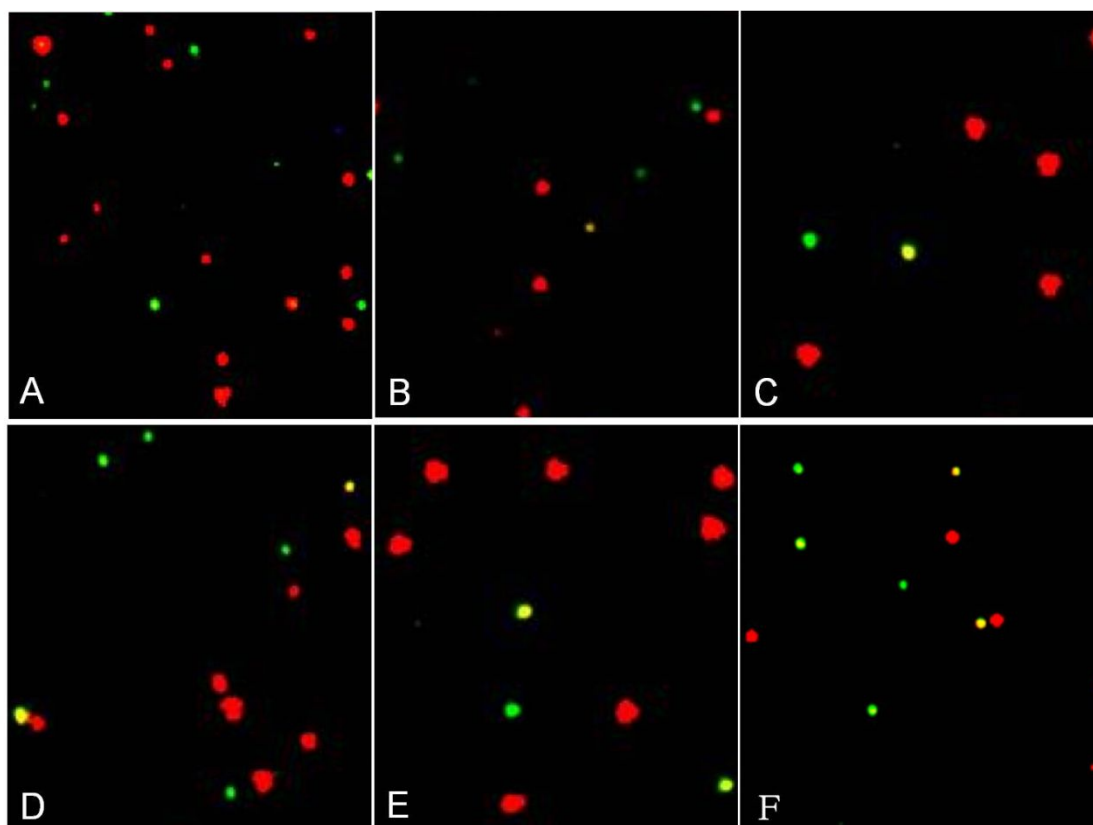

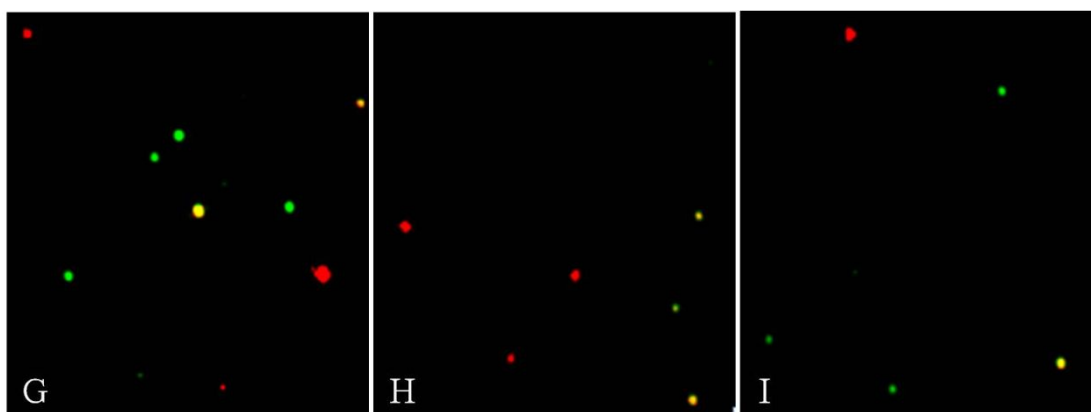

Figure S1. Representative images of anti-AFP A-QDs in the presence of AFP with different concentrations: (A) 0 pM, (B) 12.50 pM, (C) 25.00 pM, (D) 50.00 pM, (E) 75.00 pM, (F) 100.00 pM, (G) 150.00 pM, (H) 200.00 pM, (I) 300.00 pM.

| Concentration (pM) | duplicate sample | Number of Red Dots | Number of Yellow Dots | IR (%) | Average of IR | RSD | IR substrated by blank |
|--------------------|------------------|--------------------|-----------------------|--------|---------------|-----|------------------------|
| 0.00               | 1                | 289                | 31                    | 10.7   | 10.8          | 0.2 | 0.0                    |
|                    | 2                | 356                | 38                    | 10.7   |               |     |                        |
|                    | 3                | 301                | 33                    | 11.0   |               |     |                        |
| 12.50              | 1                | 180                | 29                    | 16.1   | 16.2          | 0.5 | 5.4                    |
|                    | 2                | 165                | 26                    | 15.8   |               |     |                        |
|                    | 3                | 155                | 26                    | 16.8   |               |     |                        |
| 25.00              | 1                | 171                | 36                    | 21.1   | 21.1          | 1.1 | 10.3                   |
|                    | 2                | 160                | 32                    | 20.0   |               |     |                        |
|                    | 3                | 153                | 34                    | 22.2   |               |     |                        |
| 50.00              | 1                | 152                | 45                    | 29.6   | 30.3          | 0.8 | 19.5                   |
|                    | 2                | 149                | 45                    | 30.2   |               |     |                        |
|                    | 3                | 154                | 48                    | 31.2   |               |     |                        |
| 75.00              | 1                | 145                | 59                    | 40.7   | 41.0          | 0.4 | 30.2                   |
|                    | 2                | 139                | 57                    | 41.0   |               |     |                        |
|                    | 3                | 140                | 58                    | 41.4   |               |     |                        |
| 100.00             | 1                | 132                | 67                    | 50.8   | 49.6          | 1.0 | 38.8                   |
|                    | 2                | 137                | 67                    | 48.9   |               |     |                        |
|                    | 3                | 149                | 73                    | 49.0   |               |     |                        |
| 150.00             | 1                | 141                | 80                    | 56.7   | 56.8          | 0.8 | 46.0                   |
|                    | 2                | 125                | 70                    | 56.0   |               |     |                        |
|                    | 3                | 139                | 80                    | 57.6   |               |     |                        |
| 200.00             | 1                | 128                | 61                    | 47.7   | 47.9          | 1.1 | 37.1                   |
|                    | 2                | 132                | 62                    | 47.0   |               |     |                        |
|                    | 3                | 108                | 53                    | 49.1   |               |     |                        |
| 300.00             | 1                | 117                | 45                    | 38.5   | 37.8          | 0.7 | 27.0                   |
|                    | 2                | 113                | 42                    | 37.2   |               |     |                        |
|                    | 3                | 130                | 49                    | 37.7   |               |     |                        |
| 400.00             | 1                | 141                | 43                    | 30.5   | 30.8          | 0.9 | 20.0                   |
|                    | 2                | 135                | 43                    | 31.9   |               |     |                        |
|                    | 3                | 143                | 43                    | 30.1   |               |     |                        |
| 600.00             | 1                | 128                | 34                    | 26.6   | 25.2          | 1.2 | 14.4                   |
|                    | 2                | 116                | 29                    | 25.0   |               |     |                        |
|                    | 3                | 149                | 36                    | 24.2   |               |     |                        |
| 800.00             | 1                | 151                | 30                    | 19.9   | 21.1          | 1.2 | 10.3                   |
|                    | 2                | 198                | 44                    | 22.2   |               |     |                        |
|                    | 3                | 174                | 37                    | 21.3   |               |     |                        |

Table S1 Statistics result of AFP standard curve.

| Concentration (pM) | triplicate sample | Number of Red Dots | Number of Yellow Dots | IR (%) | Average of IR | RSD | IR substrated by blank |
|--------------------|-------------------|--------------------|-----------------------|--------|---------------|-----|------------------------|
| 0.00               | 1                 | 285                | 37                    | 14.0   | 14.1          | 0.2 | 0.0                    |
|                    | 2                 | 322                | 46                    | 14.3   |               |     |                        |
|                    | 3                 | 342                | 48                    | 14.0   |               |     |                        |
| 10.42              | 1                 | 160                | 42                    | 26.3   | 26.3          | 0.6 | 12.2                   |
|                    | 2                 | 175                | 45                    | 25.7   |               |     |                        |
|                    | 3                 | 152                | 41                    | 27.0   |               |     |                        |
| 20.83              | 1                 | 163                | 49                    | 30.1   | 29.4          | 0.7 | 15.3                   |
|                    | 2                 | 160                | 47                    | 29.4   |               |     |                        |
|                    | 3                 | 143                | 41                    | 28.7   |               |     |                        |
| 41.67              | 1                 | 151                | 54                    | 35.8   | 35.1          | 1.0 | 21.0                   |
|                    | 2                 | 147                | 50                    | 34.0   |               |     |                        |
|                    | 3                 | 135                | 48                    | 35.6   |               |     |                        |
| 62.50              | 1                 | 156                | 63                    | 40.4   | 39.4          | 0.9 | 25.3                   |
|                    | 2                 | 135                | 52                    | 38.5   |               |     |                        |
|                    | 3                 | 122                | 48                    | 39.3   |               |     |                        |
| 83.33              | 1                 | 130                | 56                    | 43.1   | 44.1          | 0.9 | 30.0                   |
|                    | 2                 | 141                | 63                    | 44.7   |               |     |                        |
|                    | 3                 | 150                | 67                    | 44.7   |               |     |                        |
| 125.00             | 1                 | 136                | 73                    | 53.7   | 54.5          | 0.7 | 40.4                   |
|                    | 2                 | 138                | 76                    | 55.1   |               |     |                        |
|                    | 3                 | 124                | 68                    | 54.8   |               |     |                        |
| 166.67             | 1                 | 112                | 69                    | 61.6   | 61.7          | 0.8 | 47.6                   |
|                    | 2                 | 120                | 75                    | 62.5   |               |     |                        |
|                    | 3                 | 115                | 70                    | 60.9   |               |     |                        |
| 250.00             | 1                 | 129                | 66                    | 51.2   | 52.2          | 0.9 | 38.1                   |
|                    | 2                 | 137                | 72                    | 52.6   |               |     |                        |
|                    | 3                 | 125                | 66                    | 52.8   |               |     |                        |
| 333.33             | 1                 | 134                | 58                    | 43.3   | 44.3          | 1.3 | 30.2                   |
|                    | 2                 | 119                | 52                    | 43.7   |               |     |                        |
|                    | 3                 | 142                | 65                    | 45.8   |               |     |                        |
| 500.00             | 1                 | 135                | 46                    | 34.1   | 34.2          | 0.5 | 20.1                   |
|                    | 2                 | 130                | 44                    | 33.8   |               |     |                        |
|                    | 3                 | 141                | 49                    | 34.8   |               |     |                        |
| 666.67             | 1                 | 142                | 37                    | 26.1   | 25.6          | 0.8 | 11.5                   |
|                    | 2                 | 157                | 41                    | 26.1   |               |     |                        |
|                    | 3                 | 138                | 34                    | 24.6   |               |     |                        |

Table S2 Statistics result of CEA standard curve.
